# Supplementary material
Source: PubMed Central journal article supplement (PMC10031749)
Supplement: NIHMS1877647-supplement-supplementary_material.pdf [file NIHMS1877647-supplement-supplementary_material.pdf]

## Supplementary Material

Table 1: Summary of participant demographics in iSTAGING consortium. Age is described in format: mean  $\pm$  std [min, max]. F and M in gender represent female and male separately. Field indicates the magnetic strength of the MRI scanners.

| Study     | Subject | Age                          | Gender (F/M) | Field |
|-----------|---------|------------------------------|--------------|-------|
| BLSA-1.5T | 157     | 69.1 $\pm$ 8.5 [48.0, 85.0]  | 66 / 91      | 1.5T  |
| BLSA-3T   | 960     | 65.0 $\pm$ 14.7 [22.0, 93.0] | 525 / 435    | 3T    |
| UKBB      | 2202    | 62.8 $\pm$ 7.3 [45.0, 79.0]  | 1189 / 1013  | 3T    |
| SHIP      | 2739    | 52.6 $\pm$ 13.7 [21.2, 90.4] | 1491 / 1248  | 1.5T  |

Table 2: Summary of participant demographics in ADNI dataset. Age is described in format: mean  $\pm$  std [min, max]. F and M in gender represent female and male separately. Field indicates the magnetic strength of the MRI scanners.

| Study     | Subject | CN  | AD  | Age                         | Gender (F/M) | Field |
|-----------|---------|-----|-----|-----------------------------|--------------|-------|
| ADNI-1    | 422     | 229 | 193 | 75.5 $\pm$ 6.2 [55.0, 90.9] | 201 / 221    | 1.5T  |
| ADNI-2/GO | 441     | 294 | 147 | 73.4 $\pm$ 6.8 [55.4, 90.3] | 221 / 220    | 3T    |

Table 3: Multi-layer perceptron (MLP) network implementation details. The network is used for age regression and AD classification tasks. The output size  $k$  of the final layer is depends on the task.

| Layer              | Input Size | LeakyReLU $\alpha$ | Output Size |
|--------------------|------------|--------------------|-------------|
| Linear + LeakyReLU | 145        | 0.1                | 72          |
| Linear + LeakyReLU | 72         | 0.1                | 36          |
| Linear             | 36         | -                  | $k$         |

Table 4: Flow-based SCM implementation details. We directly learn the binary probability of sex  $s$  and categorical probability of site  $t$ .  $p_\theta^S$  and  $p_\theta^T$  are the learnable mass functions of the categorical distribution for variables sex  $s$  and site  $t$ , and  $K$  is the number of site  $t$ . The modules indicated with  $\theta$  are parameterized using neural networks. We constrain age  $a$  variable with lower bound (exponential transform) and rescale it with fixed affine transform for normalization. Spline $_\theta$  transformation refers to the linear neural spline flows [?]. The ConditionalTransform $_\theta(\cdot)$  can be conditional affine or conditional spline transform, which reparameterizes the noise distribution into another Gaussian distribution. We use linear [?] and quadratic [?] autoregressive neural spline flows for the conditional spline transform, which are more expressive compared to the affine flows. The transformation parameters of the ConditionalTransform $_\theta(\cdot)$  are predicted by a context neural network taking  $\cdot$  as input. The context networks are implemented as fully-connected networks for affine and spline flows.

| Observations                                                                                     | Exogenous noise                             |
|--------------------------------------------------------------------------------------------------|---------------------------------------------|
| $s := \epsilon_S$                                                                                | $\epsilon_S \sim \text{Ber}(p_\theta^S)$    |
| $a := f_A(\epsilon_A) = (\text{Spline}_\theta \circ \text{Affine} \circ \text{Exp})(\epsilon_A)$ | $\epsilon_A \sim \mathcal{N}(0, 1)$         |
| $t := \epsilon_T$                                                                                | $\epsilon_T \sim \text{Cat}(K, p_\theta^T)$ |
| $x := f_X(\epsilon_X; s, a, t) = (\text{ConditionalTransform}_\theta([s, a, t]))(\epsilon_X)$    | $\epsilon_X \sim \mathcal{N}(0, 1)$         |

Table 5: Comparison of associative abilities of different type of flows on iSTAGING consortium and ADNI dataset. We observe that spline flows achieved higher log-likelihood compared to that of affine flow for both datasets. This indicates that a flow with higher expressive power helps for density estimation.

| Study    | Model            | Log-likelihood |
|----------|------------------|----------------|
| iSTAGING | Affine           | 1.8817         |
|          | Linear Spline    | 17.2204        |
|          | Quadratic Spline | 17.2397        |
| ADNI     | Affine           | 1.8963         |
|          | Linear Spline    | 15.2715        |
|          | Quadratic Spline | 15.2055        |

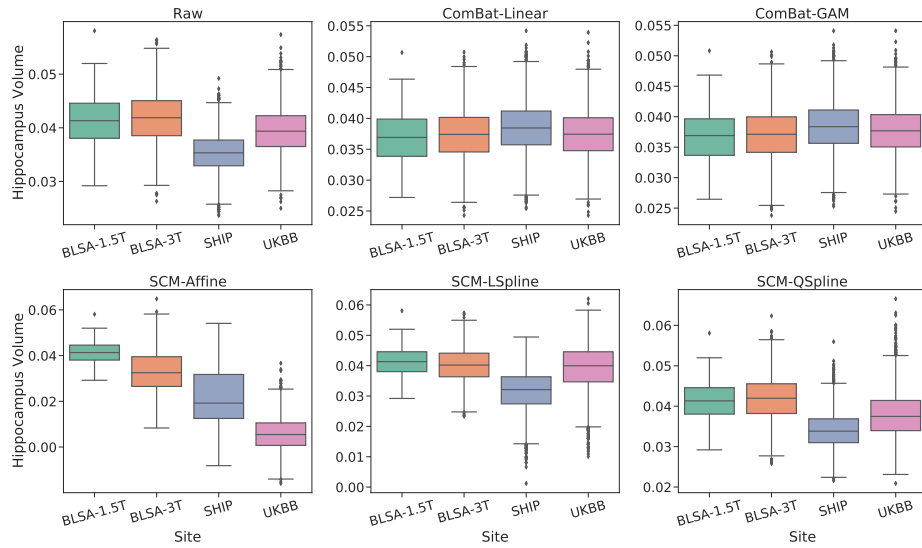

(a) Hippocampus (Right)

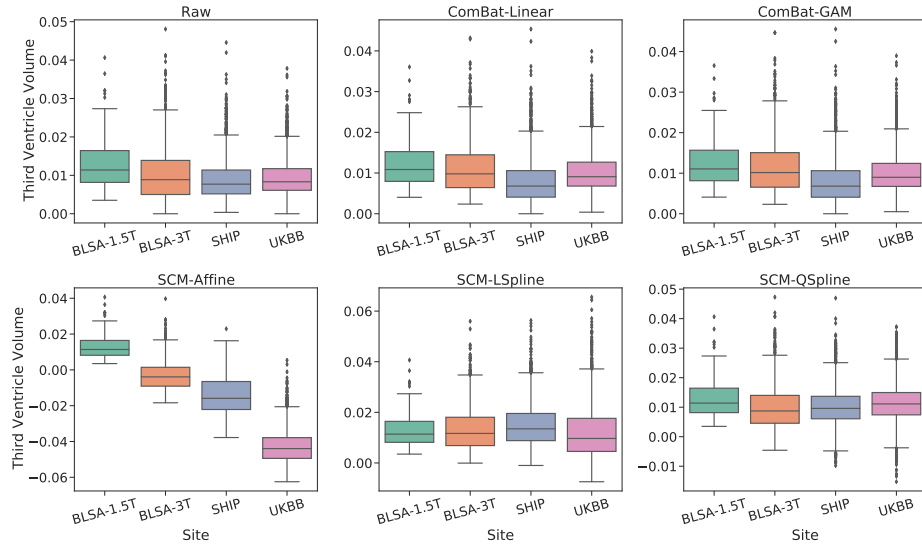

(b) Third Ventricle (Right)

Fig. 1: Comparison of normalized feature distributions cross-site in iSTAGING consortium before and after apply the ComBat methods (ComBat-Linear and ComBat-GAM) and the proposed methods (SCM-Affine, SCM-LSpline, and SCM-QSpline). The distributions of the features harmonized by ComBat methods are aligned cross-site, whereas those harmonized by our proposed method (Q-Spline) are unchanged compared to the raw features. We preserve the unknown cofounders (subject-specific information due to biological variability, such as race, gene, and pathology AD/CN) instead of removing them as site-effects, which is beneficial for downstream analysis, such as AD diagnosis.

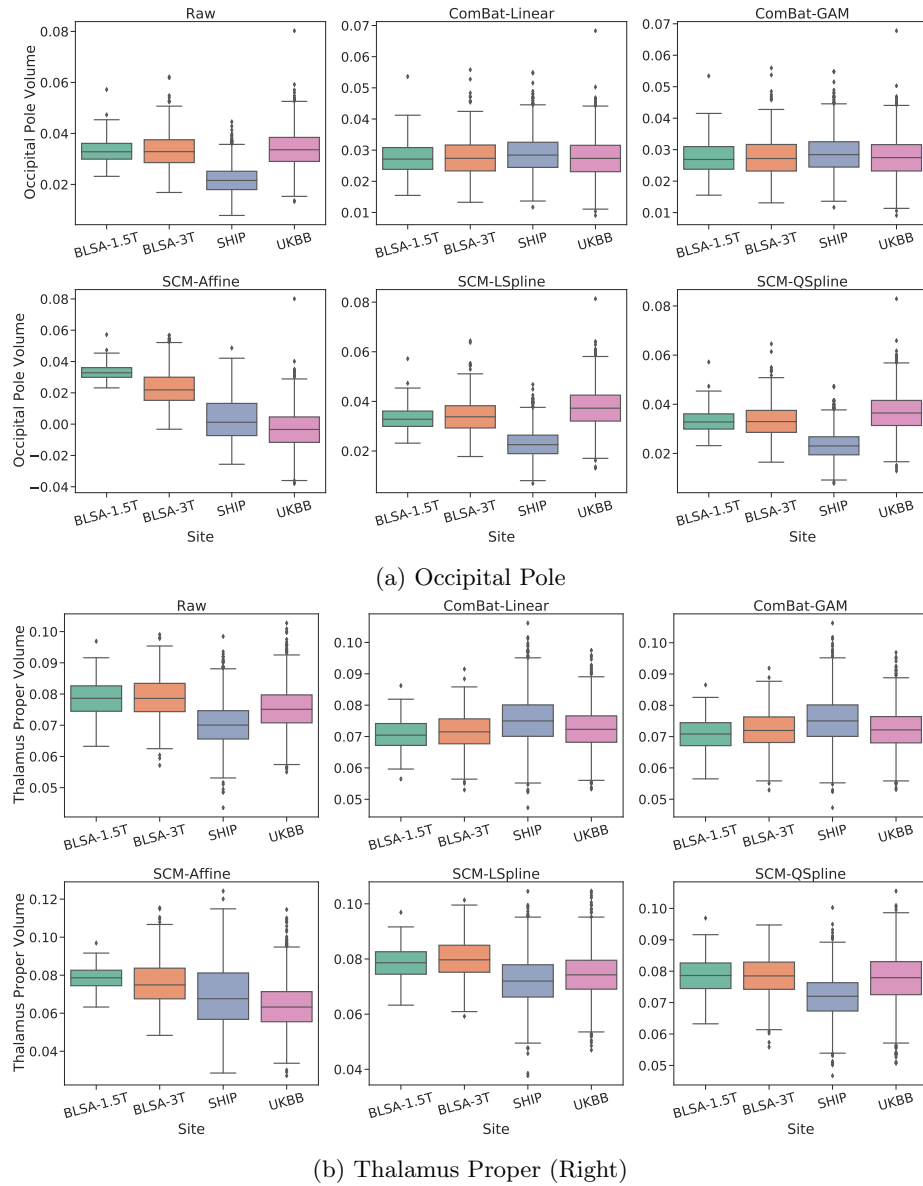

Fig. 2: Continued comparison of normalized feature distributions cross-site in iSTAGING consortium before and after apply the ComBat methods (ComBat-Linear and ComBat-GAM) and the proposed methods (SCM-Affine, SCM-LSpline, and SCM-QSpline). The distributions of the features harmonized by ComBat methods are aligned cross-site, whereas those harmonized by our proposed method (Q-Spline) are unchanged compared to the raw features. We preserve the unknown cofounders (subject-specific information due to biological variability, such as race, gene, and pathology AD/CN) instead of removing them as site-effects, which is beneficial for downstream analysis, such as AD diagnosis.
